# Supplementary material for: A new set of reference housekeeping genes for the normalization RT-qPCR data from the intestine of piglets during weaning
Source: PLoS One. 2018 Sep 26;13(9):e0204583. doi: 10.1371/journal.pone.0204583 (PMC6157878; doi:10.1371/journal.pone.0204583)
Supplement: S5 Table — (DOCX) [file pone.0204583.s005.docx]

**S5 Table. Normalization of *ALP* gene expression in the ileum against the 18 reference genes.**

|  | | | | | |  |
| --- | --- | --- | --- | --- | --- | --- |
|  | Age (post-weaning) | | | |  |  |
| Gene | Day 0 | Day 7 | Day 14 | Day 21 | SEM | *P*-value |
| *YWHA* | 12.13a | 1.00b | 4.12c | 4.70c | 2.062 | 0.009 |
| *UBC* | 1.76ab | 1.00b | 2.21a | 1.01b | 1.532 | 0.027 |
| *TBP* | 37.33a | 1.00b | 7.56c | 9.27c | 1.333 | 0.043 |
| *RPL32* | 12.90a | 1.00b | 13.86a | 11.39a | 0.910 | 0.016 |
| *RPL19* | 3.94a | 1.00b | 2.55ab | 1.12b | 1.355 | <0.001 |
| *PPIA* | 0.67 | 1.00 | 0.06 | 0.49 | 0.407 | 0.415 |
| *PPARGGIA* | 24.20ac | 1.00b | 10.49c | 37.35a | 1.212 | 0.026 |
| *PGK11* | 3.44a | 1.00b | 2.44ab | 1.32b | 0.981 | 0.011 |
| *HSPCB* | 11.82a | 1.00b | 2.26b | 3.38b | 3.129 | <0.001 |
| *CANx* | 8.39a | 1.00b | 1.74b | 3.53b | 2.456 | <0.001 |
| *ALDOA* | 16.16a | 1.00b | 0.61b | 0.51b | 2.087 | 0.009 |
| *5S* | 51.58a | 1.00b | 38.48a | 7.13c | 1.347 | 0.041 |
| *18S* | 3.11a | 1.00b | 14.61c | 9.59d | 0.901 | 0.119 |
| *B2M* | 4.07a | 1.00b | 4.58a | 4.31a | 1.916 | 0.012 |
| *B-actin* | 7.69a | 1.00b | 10.60c | 7.31a | 0.904 | 0.018 |
| *GAPDH* | 5394.17a | 1.00b | 1490.24c | 1376.18c | 2.098 | 0.008 |
| *HMBS* | 5.83a | 1.00b | 6.81a | 4.39a | 1.015 | 0.011 |
| *HPRT1* | 4.50a | 1.00b | 2.95c | 2.43c | 0.844 | 0.007 |
| *Geomean*1 | 4.45a | 1.00b | 4.51a | 3.63a | 0.597 | 0.006 |

**Note:** a,b,c Means within the same row without common superscripts differ significantly (*P* < 0.05) .

1 Means the geomean of *B2M*/*HMBS*/*HPRT1*.
