# Supplementary material for: A new set of reference housekeeping genes for the normalization RT-qPCR data from the intestine of piglets during weaning
Source: PLoS One. 2018 Sep 26;13(9):e0204583. doi: 10.1371/journal.pone.0204583 (PMC6157878; doi:10.1371/journal.pone.0204583)
Supplement: S6 Table — (DOCX) [file pone.0204583.s006.docx]

**S6 Table. Normalization of *ALP* gene expression in the colon against the 18 reference genes.**

|  | | | | | |  |
| --- | --- | --- | --- | --- | --- | --- |
|  | Age (post-weaning) | | | |  |  |
| Gene | Day 0 | Day 7 | Day 14 | Day 21 | SEM | *P*-value |
| *YWHA* | 7.06a | 1.00b | 2.99b | 0.87b | 1.499 | 0.007 |
| *UBC* | 11.00a | 1.00b | 4.03c | 3.72c | 1.863 | 0.014 |
| *TBP* | 12.39a | 1.00b | 0.96b | 0.55b | 1.146 | 0.046 |
| *RPL32* | 5.29a | 1.00b | 2.77b | 2.19b | 1.576 | 0.007 |
| *RPL19* | 7.45a | 1.00b | 1.56b | 1.30b | 11.666 | <0.001 |
| *PPIA* | 11.60a | 1.00b | 0.87b | 1.17b | 2.187 | 0.007 |
| *PPARGGIA* | 8.05a | 1.00b | 2.97b | 0.80b | 1.451 | 0.033 |
| *PGK11* | 8.35a | 1.00b | 4.56ab | 3.23ab | 1.073 | 0.078 |
| *HSPCB* | 1.12a | 1.00a | 0.47ab | 0.17b | 0.618 | 0.023 |
| *CANx* | 3.51a | 1.00ab | 10.62c | 0.33b | 0.572 | 0.047 |
| *ALDOA* | 8.80a | 1.00b | 3.41c | 1.23b | 2.706 | <0.001 |
| *5S* | 5.25a | 1.00b | 2.48b | 2.16b | 1.375 | 0.039 |
| *18S* | 39.49a | 1.00b | 4.76c | 4.64c | 1.806 | 0.015 |
| *B2M* | 8.76a | 1.00b | 2.17c | 1.99bc | 2.867 | 0.002 |
| *B-actin* | 17.67a | 1.00b | 2.21bc | 3.17c | 1.657 | 0.021 |
| *GAPDH* | 0.01a | 1.00b | 0.20a | 0.01a | 1.413 | 0.036 |
| *HMBS* | 17.72a | 1.00b | 3.22b | 2.28b | 3.018 | 0.002 |
| *HPRT1* | 13.36a | 1.00b | 3.32c | 1.87b | 2.759 | 0.002 |
| *Geomean*1 | 12.19a | 1.00b | 2.70b | 2.06b | 1.022 | 0.001 |

**Note:** a,b,c Means within the same row without common superscripts differ significantly (*P* < 0.05) .

1 Means the geomean of *B2M*/*HMBS*/*HPRT1*.
