# Supplementary material for: A new set of reference housekeeping genes for the normalization RT-qPCR data from the intestine of piglets during weaning
Source: PLoS One. 2018 Sep 26;13(9):e0204583. doi: 10.1371/journal.pone.0204583 (PMC6157878; doi:10.1371/journal.pone.0204583)
Supplement: S7 Table — (DOCX) [file pone.0204583.s007.docx]

**S7 Table. Normalization of ALP gene expression in the whole gastrointestinal tract against the 18 reference genes.**

|  | Age (post-weaning) | | | |  |  |
| --- | --- | --- | --- | --- | --- | --- |
| Gene | Day 0 | Day 7 | Day 14 | Day 21 | SEM | *P*-value |
| *YWHA* | 2.67a | 1.00b | 1.85ab | 1.37b | 1.496 | <0.001 |
| *UBC* | 2.03a | 1.00b | 2.02a | 1.45ab | 2.278 | <0.001 |
| *TBP* | 3.05a | 1.00b | 2.21a | 1.55ab | 1.253 | 0.001 |
| *RPL32* | 2.24a | 1.00b | 2.11a | 1.68ab | 2.195 | <0.001 |
| *RPL19* | 2.31a | 1.00b | 1.95ab | 1.38ab | 2.451 | <0.001 |
| *PPIA* | 2.57a | 1.00b | 1.11b | 1.10b | 0.568 | 0.005 |
| *PPARGGIA* | 2.11a | 1.00b | 2.23a | 2.03a | 3.437 | <0.001 |
| *PGK11* | 2.12a | 1.00b | 2.12a | 1.45ab | 4.399 | <0.001 |
| *HSPCB* | 2.59a | 1.00b | 2.07a | 1.44ab | 1.106 | 0.002 |
| *CANx* | 2.72a | 1.00b | 2.39a | 1.53ab | 2.147 | <0.001 |
| *ALDOA* | 3.40a | 1.00b | 2.40a | 1.45ab | 0.498 | 0.048 |
| *5S* | 2.71a | 1.00b | 2.00ab | 2.22a | 1.041 | 0.003 |
| *18S* | 2.21a | 1.00b | 1.56ab | 1.30ab | 1.873 | <0.001 |
| *B2M* | 2.43a | 1.00b | 1.65ab | 1.57ab | 0.425 | <0.001 |
| *B-actin* | 2.42a | 1.00b | 1.73ab | 1.65ab | 1.368 | <0.001 |
| *GAPDH* | 3.29 | 1.00 | 1.06 | 1.55 | 0.257 | 0.294 |
| *HMBS* | 2.51a | 1.00b | 1.81ab | 1.66ab | 1.142 | <0.001 |
| *HPRT1* | 2.49a | 1.00b | 1.72ab | 1.55ab | 1.666 | <0.001 |
| *Geomean*1 | 2.47a | 1.00b | 1.71c | 1.59c | 0.169 | <0.001 |

**Note:** a,b,c Means within the same row without common superscripts differ significantly (*P* < 0.05) .

1 Means the geomean of *B2M*/*HMBS*/*HPRT1*.
